# Supplementary material
Source: MDPI journal article supplement (https://www.mdpi.com/2073-4344/11/12/1462)
Supplement: s1 [file s1]

## Supplementary Information

### **‘Oxygen-consuming complexes’ – Catalytic effects of iron salen-complexes with dioxygen**

Katarzyna Rydel-Ciszek<sup>1\*</sup>, Tomasz Paczeński<sup>1</sup>, Anna Miłaczewska<sup>2</sup>, Paweł Chmielarz<sup>1</sup>, Andrzej Sobkowiak<sup>1</sup>

<sup>1</sup> Department of Physical Chemistry, Faculty of Chemistry, Rzeszów University of Technology, Al. Powstańców Warszawy 6, 35-959 Rzeszów, Poland

<sup>2</sup> Jerzy Haber Institute of Catalysis and Surface Chemistry, Polish Academy of Sciences, 30-239 Kraków, Poland

\* Correspondence: [kasiar@prz.edu.pl](mailto:kasiar@prz.edu.pl)

**Table S1.** Oxidation of 1 M cyclohexene by air in acetonitrile at room temperature ( $23 \pm 1$  °C) catalyzed by the iron-salen complex at various concentrations. Reaction time 24 h.

| Catalyst, mM | Ketone, mM | Alcohol, mM | Epoxide, mM |
|--------------|------------|-------------|-------------|
| 0.5          | 35.9       | 15.7        | 0.6         |
| 1            | 53.6       | 26.1        | 0.9         |
| 2.5          | 55.8       | 38.2        | 0.7         |
| 5            | 42.3       | 33.8        | 0.3         |
| 7.5          | 0.0        | 0.0         | 0.0         |
| 10           | 0.0        | 0.0         | 0.0         |

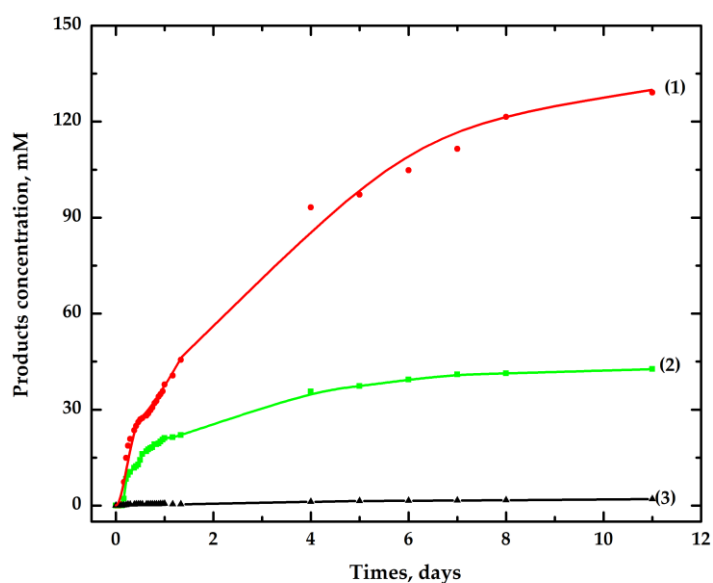

**Figure S1.** Dependence of product concentration for (1) ketone, (2) alcohol, (3) epoxide on time during oxidation of 1 M cyclohexene by air ( $p_{O_2} = 0.2$  atm) catalyzed by 1 mM  $[(\text{salen})\text{Fe}^{\text{II}}]_{\text{MeCN}}$  in acetonitrile, room temperature  $23 \pm 1$  °C.

**Table S2.** Concentrations of products for the oxidation of 1 M cyclohexene with dioxygen in acetonitrile catalyzed by different Fe-salen complexes (1 mM) after 24 h at room temperature ( $23 \pm 1$  °C).

| Catalyst,<br>mM                                      | Ketone,<br>mM | Alcohol,<br>mM | Epoxide,<br>mM | TON  |
|------------------------------------------------------|---------------|----------------|----------------|------|
| $[(\text{salen})\text{Fe}^{\text{II}}]$              | 27.8          | 12.6           | 0.4            | 40.8 |
| $[(\text{salen})\text{Fe}^{\text{III}}]\text{ClO}_4$ | 11.7          | 2.7            | 0.3            | 14.7 |
| $[(\text{salen})\text{Fe}^{\text{III}}]\text{Cl}$    | 0.0           | 0.0            | 0.0            | 0.0  |

TON – product molecules per catalyst molecule

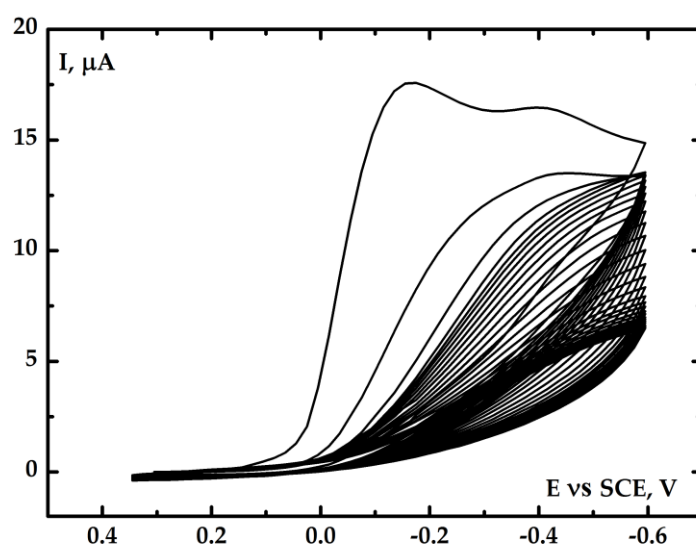

**Figure S2.** Cyclic voltammograms in acetonitrile (0.1 M  $\text{Et}_4\text{NClO}_4$ ) for 5 mM  $[(\text{salen})\text{Fe}^{\text{III}}]^+\text{MeCN}$  in an air atmosphere. Scan rate,  $0.1 \text{ V s}^{-1}$ , GCE ( $0.008 \text{ cm}^2$ ); SCE vs. NHE,  $+0.242 \text{ V}$ , cathodic scans.

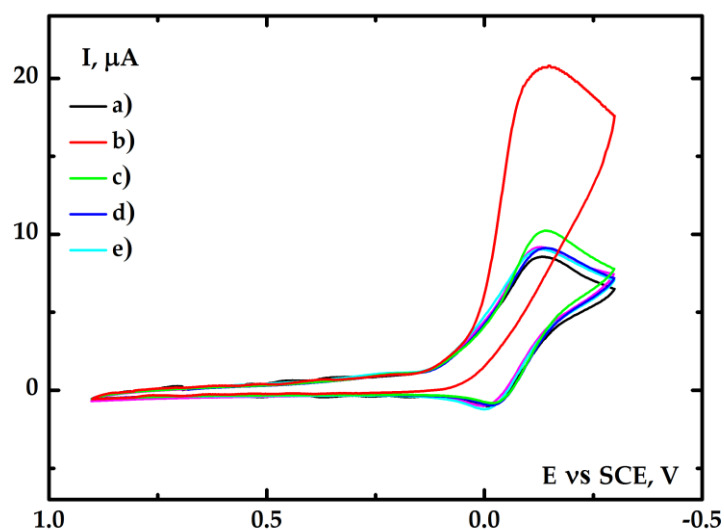

**Figure S3.** Cyclic voltammograms in acetonitrile (0.1 M Et<sub>4</sub>NClO<sub>4</sub>) for 5 mM [(salen)Fe<sup>III</sup>](ClO<sub>4</sub>)<sub>3</sub> in: a) argon atmosphere, b) air atmosphere, and after oxygen removal from previously oxygenated catalyst solution after c) 5 min, d) 10 min, and e) 15 min of purging with Ar. Scan rate, 0.1 Vs<sup>-1</sup>, GCE (0.008 cm<sup>2</sup>); SCE vs. NHE, +0.242 V, cathodic scans.

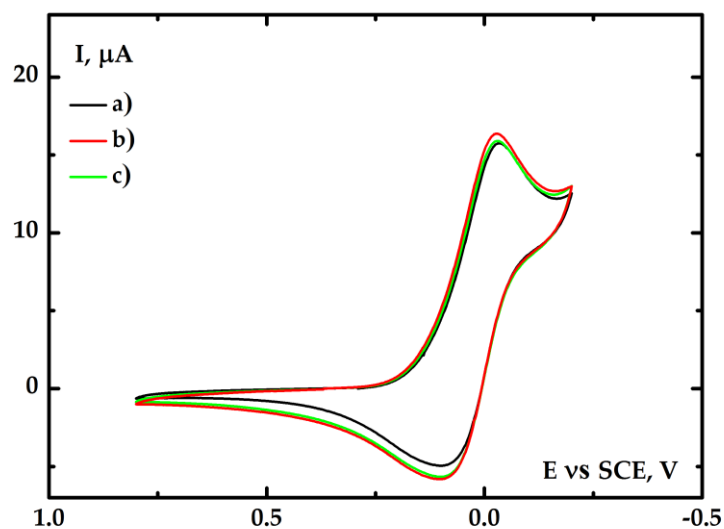

**Figure S4.** Cyclic voltammograms in acetonitrile (0.1 M Et<sub>4</sub>NClO<sub>4</sub>) for 5 mM [(salen)Fe<sup>III</sup>]Cl in: a) argon atmosphere, b) air atmosphere, and after deoxidation of previously oxygenated catalyst solution after c) 5 min of deoxidation by use of Ar atmosphere. Scan rate, 0.1 Vs<sup>-1</sup>, GCE (0.008 cm<sup>2</sup>); SCE vs. NHE, +0.242 V, cathodic scans.

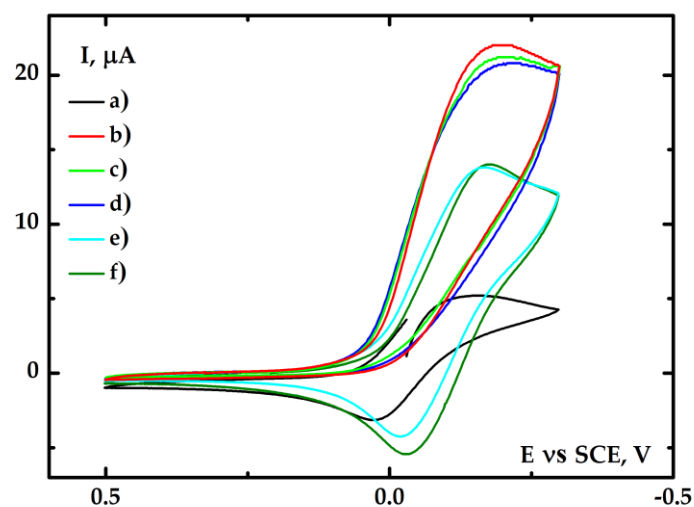

**Figure S5.** Cyclic voltammograms in acetonitrile (0.1 M  $\text{Et}_4\text{NClO}_4$ ) for 5 mM  $[(\text{salen})\text{Fe}^{\text{II}}]_{\text{MeCN}}$  in: a) an argon atmosphere, b) an air atmosphere, and after oxygen removal of the previously oxygenated catalyst solution after c) 5 min, d) 10 min, e) 15 min, and f) 45 min of purging with Ar. Scan rate,  $0.1 \text{ Vs}^{-1}$ , GCE ( $0.008 \text{ cm}^2$ ); SCE *vs.* NHE, +0.242 V, cathodic scans.

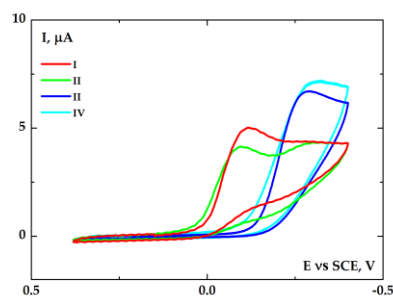

**a)** air ( $p_{\text{O}_2} = 0.2 \text{ atm}$ )

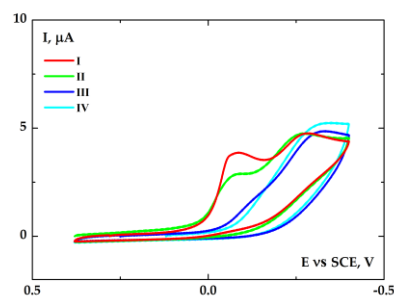

**b)** dioxygen ( $p_{\text{O}_2} = 1 \text{ atm}$ )

**Figure S6.** Cyclic voltammograms in acetonitrile (0.1 M  $\text{Et}_4\text{NClO}_4$ ) for iron species formed in a reaction of 1 mM  $[(\text{salen})\text{Fe}^{\text{II}}]_{\text{MeCN}}$  with  $\text{O}_2$  and 1 M cyclohexene, a) air ( $p_{\text{O}_2} = 0.2 \text{ atm}$ ) atmosphere, b) dioxygen ( $p_{\text{O}_2} = 1 \text{ atm}$ ) atmosphere. Scan rate,  $0.1 \text{ Vs}^{-1}$ , GCE ( $0.008 \text{ cm}^2$ ); SCE *vs.* NHE, +0.242 V, cathodic scans. Oxygenated catalyst with 1 M of cyclohexene in time after: I – 0 min (immediately after aeration), II – 30 min, III – 3 hours, IV – 12 hours.

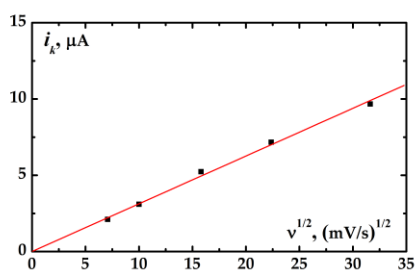

a)

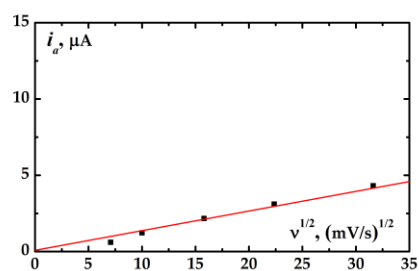

b)

**Figure S7.** Dependence of  $i$  ( $\mu\text{A}$ ) on  $v^{1/2}$  ( $\text{mV/s}$ ) $^{1/2}$  registered in acetonitrile (0.1 M  $\text{Et}_4\text{NClO}_4$ ) for 1 mM  $[(\text{salen})\text{Fe}^{\text{II}}]_{\text{MeCN}}$  in an argon atmosphere for **a)** cathodic ( $-0.1$  V) and **b)** anodic ( $\sim 0$  V) peaks.

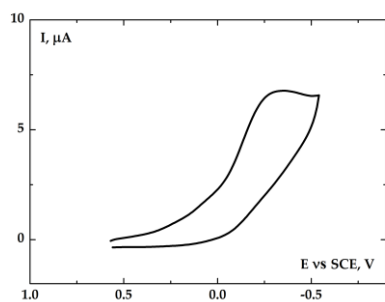

a)

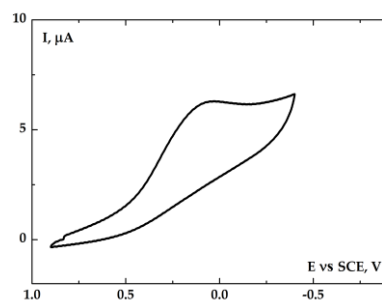

b)

**Figure S8.** Cyclic voltammograms in acetonitrile (0.1 M  $\text{Et}_4\text{NClO}_4$ ) for 1 mM  $[(\text{salen})\text{Fe}^{\text{II}}]_{\text{MeCN}}$  under Ar atmosphere a) with 15 mM PhIO, b) with 15 mM PhIO and 30 mM  $\text{HClO}_4$ . Scan rate,  $0.1 \text{ V s}^{-1}$ , GCE ( $0.008 \text{ cm}^2$ ); SCE vs. NHE,  $+0.242 \text{ V}$ , cathodic scans.

**Table S3.** Energies (with and without zero point correction), enthalpies, free energies (G), and respective relative values for different catalyst molecules calculated with Def2SVP.

| <b>Molecules</b>                              | <b>Electronic Energy</b> | Sum of electronic and zero-point <b>Energies</b> | Sum of electronic and thermal <b>Energies</b> | Sum of electronic and thermal <b>Enthalpies</b> | Sum of electronic and thermal <b>Free Energies</b> | Relative <b>Electronic Energy</b> | Relative <b>Gibbs Free Energy</b> |
|-----------------------------------------------|--------------------------|--------------------------------------------------|-----------------------------------------------|-------------------------------------------------|----------------------------------------------------|-----------------------------------|-----------------------------------|
|                                               | [a.u.]                   | [a.u.]                                           | [a.u.]                                        | [a.u.]                                          | [a.u.]                                             | [kJ/mol]                          | [kJ/mol]                          |
|                                               | $\epsilon_0$             | $\epsilon_0 + \text{ZPE}$                        | $\epsilon_0 + E_{tot}$                        | $\epsilon_0 + H_{corr}$                         | $\epsilon_0 + G_{corr}$                            | $\Delta(\epsilon_0 + \text{ZPE})$ | $\Delta G$                        |
| <sup>1</sup> [Fe(salen)]                      | -2141.17542              | -2140.903345                                     | -2140.886871                                  | -2140.885927                                    | -2140.947783                                       | <b>125.4</b>                      | <b>132.9</b>                      |
| <sup>3</sup> [Fe(salen)]                      | -2141.22141              | -2140.949504                                     | -2140.932864                                  | -2140.931919                                    | -2140.994995                                       | <b>4.2</b>                        | <b>9.0</b>                        |
| <sup>5</sup> [Fe(salen)]                      | -2141.22126              | -2140.951113                                     | -2140.933768                                  | -2140.932823                                    | -2140.998419                                       | <b>0</b>                          | <b>0</b>                          |
| <sup>2</sup> [Fe(salen)]Cl                    | -2601.310640             | -2601.036897                                     | -2601.018524                                  | -2601.017580                                    | -2601.084465                                       | <b>71.7</b>                       | <b>78.5</b>                       |
| <sup>4</sup> [Fe(salen)]Cl                    | -2601.324835             | -2601.051553                                     | -2601.032948                                  | -2601.032004                                    | -2601.100260                                       | <b>33.3</b>                       | <b>37.1</b>                       |
| <sup>6</sup> [Fe(salen)]Cl                    | -2601.336367             | -2601.064225                                     | -2601.045185                                  | -2601.044240                                    | -2601.114376                                       | <b>0</b>                          | <b>0</b>                          |
| <sup>2</sup> [Fe(salen)]ClO <sub>4</sub>      | -2901.579156             | -2901.289455                                     | -2901.267576                                  | -2901.266632                                    | -2901.341353                                       | <b>55.1</b>                       | <b>66.1</b>                       |
| <sup>4</sup> [Fe(salen)]ClO <sub>4</sub>      | -2901.595051             | -2901.305953                                     | -2901.283688                                  | -2901.282744                                    | -2901.359557                                       | <b>11.8</b>                       | <b>18.3</b>                       |
| <sup>6</sup> [Fe(salen)]ClO <sub>4</sub>      | -2901.598191             | -2901.310444                                     | -2901.287609                                  | -2901.286664                                    | -2901.366543                                       | <b>0</b>                          | <b>0</b>                          |
| <sup>1</sup> [Fe(salen)]=O                    | -2216.298160             | -2216.022514                                     | -2216.004831                                  | -2216.003887                                    | -2216.068037                                       | <b>96.1</b>                       | <b>98.5</b>                       |
| <sup>3</sup> [Fe(salen)]=O                    | -2216.334670             | -2216.05911                                      | -2216.041401                                  | -2216.040457                                    | -2216.105569                                       | <b>0</b>                          | <b>0</b>                          |
| <sup>5</sup> [Fe(salen)]=O                    | -2216.330210             | -2216.056267                                     | -2216.037977                                  | -2216.037033                                    | -2216.104402                                       | <b>7.5</b>                        | <b>3.1</b>                        |
| <sup>1</sup> (Cl)[(salen)Fe]=O                | -2676.459913             | -2676.184429                                     | -2676.164950                                  | -2676.164006                                    | -2676.231918                                       | <b>125.0</b>                      | <b>131.7</b>                      |
| <sup>3</sup> (Cl)[(salen)Fe]=O                | -2676.506008             | -2676.230404                                     | -2676.210984                                  | -2676.210040                                    | -2676.278808                                       | <b>4.3</b>                        | <b>8.6</b>                        |
| <sup>5</sup> (Cl)[(salen)Fe]=O                | -2676.506696             | -2676.232035                                     | -2676.211998                                  | -2676.211053                                    | -2676.282069                                       | <b>0</b>                          | <b>0</b>                          |
| <sup>1</sup> (ClO <sub>4</sub> )[(salen)Fe]=O | -2976.768910             | -2976.478225                                     | -2976.454921                                  | -2976.453977                                    | -2976.530777                                       | <b>84.4</b>                       | <b>87.5</b>                       |
| <sup>3</sup> (ClO <sub>4</sub> )[(salen)Fe]=O | -2976.326108             | -2976.510369                                     | -2976.487186                                  | -2976.486241                                    | -2976.564120                                       | <b>0</b>                          | <b>0</b>                          |
| <sup>5</sup> (ClO <sub>4</sub> )[(salen)Fe]=O | -2976.798832             | -2976.508500                                     | -2976.484871                                  | -2976.483927                                    | -2976.563259                                       | <b>4.9</b>                        | <b>2.3</b>                        |
| <sup>2</sup> [Fe(salen)]OH                    | -2216.97619              | -2216.689958                                     | -2216.671640                                  | -2216.670696                                    | -2216.736837                                       | <b>58.4</b>                       | <b>66.2</b>                       |
| <sup>4</sup> [Fe(salen)]OH                    | -2216.98108              | -2216.696433                                     | -2216.677536                                  | -2216.676592                                    | -2216.744959                                       | <b>41.4</b>                       | <b>44.8</b>                       |
| <sup>6</sup> [Fe(salen)]OH                    | -2216.99564              | -2216.712218                                     | -2216.692834                                  | -2216.691890                                    | -2216.762041                                       | <b>0</b>                          | <b>0</b>                          |
| <sup>2</sup> (Cl)[Fe(salen)]OH                | -2677.15741              | -2676.871028                                     | -2676.851020                                  | -2676.850076                                    | -2676.919545                                       | <b>28.8</b>                       | <b>37.0</b>                       |
| <sup>4</sup> (Cl)[Fe(salen)]OH                | -2677.15142              | -2676.866041                                     | -2676.845332                                  | -2676.844388                                    | -2676.916353                                       | <b>41.9</b>                       | <b>45.4</b>                       |
| <sup>6</sup> (Cl)[Fe(salen)]OH                | -2677.16515              | -2676.882005                                     | -2676.860763                                  | -2676.859819                                    | -2676.933651                                       | <b>0</b>                          | <b>0</b>                          |

**Table S3 (cont).** Energies (with and without zero point correction), enthalpies, free energies (G), and respective relative values for different catalyst molecules calculated with Def2SVP.

| Molecules                                                 | Electronic Energy | Sum of<br>electronic and<br>zero-point<br>Energies | Sum of<br>electronic and<br>thermal<br>Energies | Sum of electronic<br>and thermal<br>Enthalpies | Sum of<br>electronic and<br>thermal Free<br>Energies | Relative<br>Electronic<br>Energy  | Relative<br>Gibbs Free<br>Energy |
|-----------------------------------------------------------|-------------------|----------------------------------------------------|-------------------------------------------------|------------------------------------------------|------------------------------------------------------|-----------------------------------|----------------------------------|
|                                                           | [a.u.]            | [a.u.]                                             | [a.u.]                                          | [a.u.]                                         | [a.u.]                                               | [kJ/mol]                          | [kJ/mol]                         |
|                                                           | $\epsilon_0$      | $\epsilon_0 + \text{ZPE}$                          | $\epsilon_0 + E_{tot}$                          | $\epsilon_0 + H_{corr}$                        | $\epsilon_0 + G_{corr}$                              | $\Delta(\epsilon_0 + \text{ZPE})$ | $\Delta G$                       |
| $^2(\text{ClO}_4)[\text{Fe}(\text{salen})]\text{OH}$      | -2977.450727      | -2977.148087                                       | -2977.124479                                    | -2977.123535                                   | -2977.201457                                         | <b>34.2</b>                       | <b>42.9</b>                      |
| $^4(\text{ClO}_4)[\text{Fe}(\text{salen})]\text{OH}$      | -2977.435956      | -2977.135490                                       | -2977.111165                                    | -2977.110221                                   | -2977.190547                                         | <b>67.3</b>                       | <b>71.6</b>                      |
| $^6(\text{ClO}_4)[\text{Fe}(\text{salen})]\text{OH}$      | -2977.460724      | -2977.161117                                       | -2977.136214                                    | -2977.135270                                   | -2977.217812                                         | <b>0</b>                          | <b>0</b>                         |
| $^1[\text{Fe}(\text{salen})]\text{OO}\cdot$               | -2291.40266       | -2291.123793                                       | -2291.104859                                    | -2291.103915                                   | -2291.170717                                         | <b>93.6</b>                       | <b>107.1</b>                     |
| $^3[\text{Fe}(\text{salen})]\text{OO}\cdot$               | -2291.43199       | -2291.154694                                       | -2291.135149                                    | -2291.134205                                   | -2291.203523                                         | <b>12.4</b>                       | <b>20.9</b>                      |
| $^5[\text{Fe}(\text{salen})]\text{OO}\cdot$               | -2291.43570       | -2291.159426                                       | -2291.138974                                    | -2291.138030                                   | -2291.211499                                         | <b>0</b>                          | <b>0</b>                         |
| $^1(\text{Cl})[\text{Fe}(\text{salen})]\text{OO}\cdot$    | -2751.58556       | -2751.306537                                       | -2751.285913                                    | -2751.284968                                   | -2751.355271                                         | <b>114.3</b>                      | <b>127.4</b>                     |
| $^3(\text{Cl})[\text{Fe}(\text{salen})]\text{OO}\cdot$    | -2751.61077       | -2751.332789                                       | -2751.311578                                    | -2751.310634                                   | -2751.385114                                         | <b>45.3</b>                       | <b>49.0</b>                      |
| $^5(\text{Cl})[\text{Fe}(\text{salen})]\text{OO}\cdot$    | -2751.62539       | -2751.350054                                       | -2751.327699                                    | -2751.326755                                   | -2751.403779                                         | <b>0</b>                          | <b>0</b>                         |
| $^1(\text{ClO}_4)[\text{Fe}(\text{salen})]\text{OO}\cdot$ | -3051.876855      | -3051.581933                                       | -3051.557545                                    | -3051.556601                                   | -3051.635635                                         | <b>91.3</b>                       | <b>106.5</b>                     |
| $^3(\text{ClO}_4)[\text{Fe}(\text{salen})]\text{OO}\cdot$ | -3051.905139      | -3051.610874                                       | -3051.586226                                    | -3051.585281                                   | -3051.666001                                         | <b>15.3</b>                       | <b>26.7</b>                      |
| $^5(\text{ClO}_4)[\text{Fe}(\text{salen})]\text{OO}\cdot$ | -3051.909204      | -3051.616701                                       | -3051.590789                                    | -3051.589845                                   | -3051.676183                                         | <b>0</b>                          | <b>0</b>                         |
| $^2[\text{Fe}(\text{salen})]\text{OOH}$                   | -2292.053783      | -2291.764237                                       | -2291.744507                                    | -2291.743563                                   | -2291.812828                                         | <b>48.4</b>                       | <b>55.6</b>                      |
| $^4[\text{Fe}(\text{salen})]\text{OOH}$                   | -2292.057796      | -2291.769253                                       | -2291.748993                                    | -2291.748049                                   | -2291.819396                                         | <b>35.2</b>                       | <b>38.4</b>                      |
| $^6[\text{Fe}(\text{salen})]\text{OOH}$                   | -2292.070061      | -2291.782663                                       | -2291.761923                                    | -2291.760979                                   | -2291.834006                                         | <b>0</b>                          | <b>0</b>                         |
| $^2(\text{ClO}_4)[\text{Fe}(\text{salen})]\text{OOH}$     | -3052.535504      | -3052.228737                                       | -3052.204117                                    | -3052.203173                                   | -3052.283296                                         | <b>25.6</b>                       | <b>34.9</b>                      |
| $^4(\text{ClO}_4)[\text{Fe}(\text{salen})]\text{OOH}$     | -3052.526124      | -3052.220882                                       | -3052.195272                                    | -3052.194328                                   | -3052.278456                                         | <b>46.2</b>                       | <b>47.6</b>                      |
| $^6(\text{ClO}_4)[\text{Fe}(\text{salen})]\text{OOH}$     | -3052.542459      | -3052.238470                                       | -3052.212574                                    | -3052.211630                                   | -3052.296591                                         | <b>0</b>                          | <b>0</b>                         |
| $^2(\text{Cl})[\text{Fe}(\text{salen})]\text{OOH}$        | -2752.243878      | -2751.953274                                       | -2751.932313                                    | -2751.931369                                   | -2752.002879                                         | <b>26.9</b>                       | <b>35.9</b>                      |
| $^4(\text{Cl})[\text{Fe}(\text{salen})]\text{OOH}$        | -2752.236502      | -2751.947496                                       | -2751.925723                                    | -2751.924779                                   | -2751.999193                                         | <b>42.1</b>                       | <b>45.6</b>                      |
| $^6(\text{Cl})[\text{Fe}(\text{salen})]\text{OOH}$        | -2752.251290      | -2751.963518                                       | -2751.941330                                    | -2751.940386                                   | -2752.016568                                         | <b>0</b>                          | <b>0</b>                         |
| H atom                                                    | -0.501259         | -0.501259                                          | -0.499843                                       | -0.498898                                      | -0.511913                                            | <b>0</b>                          | <b>0</b>                         |



**Table S4.** Energies (with and without zero point correction), enthalpies, free energies (G) calculated with Def2TZVP, and the MeCN model for the best multiplicity of different catalyst molecules determined on the basis of the data presented in Table S3.

| <b>Molecules</b>                               | <b>Electronic Energy</b> | Sum of electronic<br>and zero-point<br><b>Energies</b> | Sum of electronic and<br>thermal <b>Energies</b> | Sum of electronic<br>and thermal<br><b>Enthalpies</b> | Sum of electronic<br>and thermal <b>Free</b><br><b>Energies</b> |
|------------------------------------------------|--------------------------|--------------------------------------------------------|--------------------------------------------------|-------------------------------------------------------|-----------------------------------------------------------------|
|                                                | [a.u.]                   | [a.u.]                                                 | [a.u.]                                           | [a.u.]                                                | [a.u.]                                                          |
|                                                | $\epsilon_0$             | $\epsilon_0 + \text{ZPE}$                              | $\epsilon_0 + E_{\text{tot}}$                    | $\epsilon_0 + H_{\text{corr}}$                        | $\epsilon_0 + G_{\text{corr}}$                                  |
| <sup>5</sup> [Fe(salen)]=O                     | -2217.57376422           | -2217.299821                                           | -2217.281531                                     | -2217.280587                                          | <b>-2217.347956</b>                                             |
| <sup>5</sup> (Cl)[(salen)Fe]=O                 | -2677.98328079           | -2677.70862                                            | -2677.688583                                     | -2677.687638                                          | <b>-2677.758654</b>                                             |
| <sup>5</sup> (ClO <sub>4</sub> )[(salen)Fe]=O  | -2979.20757813           | -2978.917246                                           | -2978.893617                                     | -2978.892673                                          | <b>-2978.972005</b>                                             |
| <sup>6</sup> [Fe(salen)]OH                     | -2218.24122624           | -2217.957804                                           | -2217.93842                                      | -2217.937476                                          | <b>-2218.007627</b>                                             |
| <sup>6</sup> (Cl)[Fe(salen)]OH                 | -2678.64435036           | -2678.361205                                           | -2678.339963                                     | -2678.339019                                          | <b>-2678.412851</b>                                             |
| <sup>6</sup> (ClO <sub>4</sub> )[Fe(salen)]OH  | -2979.87400023           | -2979.574393                                           | -2979.54949                                      | -2979.548546                                          | <b>-2979.631088</b>                                             |
| <sup>5</sup> [Fe(salen)]OO·                    | -2292.76399083           | -2292.487717                                           | -2292.467265                                     | -2292.466321                                          | <b>-2292.539790</b>                                             |
| <sup>5</sup> (Cl)[Fe(salen)]OO·                | -2753.18349700           | -2752.908161                                           | -2752.885806                                     | -2752.884862                                          | <b>-2752.961886</b>                                             |
| <sup>5</sup> (ClO <sub>4</sub> )[Fe(salen)]OO· | -3053.92676551           | -3053.634263                                           | -3053.608351                                     | -3053.607407                                          | <b>-3053.693745</b>                                             |
| <sup>6</sup> [Fe(salen)]OOH                    | -2293.40590815           | -2293.11851                                            | -2293.09777                                      | -2293.096826                                          | <b>-2293.169853</b>                                             |
| <sup>6</sup> (ClO <sub>4</sub> )[Fe(salen)]OOH | -3054.56666259           | -3054.262674                                           | -3054.236778                                     | -3054.235834                                          | <b>-3054.320795</b>                                             |
| <sup>6</sup> (Cl)[Fe(salen)]OOH                | -2753.81628125           | -2753.528509                                           | -2753.506321                                     | -2753.505377                                          | <b>-2753.581559</b>                                             |
| H atom                                         | -0.502175248866          | -0.502175249                                           | -0.500759249                                     | -0.499815249                                          | <b>-0.512829249</b>                                             |

**Table S5.** Relative energies and Gibbs free energies and values of  $\epsilon_0$ , ZPE,  $E_{corr}$ ,  $H_{corr}$ ,  $G_{corr}$  of the singlet (1), triplet (3), and quintet (5) for the reaction of cyclohexene oxidation catalyzed by [(salen)Fe<sup>IV</sup>=O] to alcohol and [(salen)Fe<sup>III</sup>]. Calculated relative energies with ZPE correction as well as Gibbs free energies are given in reference to substrate <sup>3</sup>S.

|           |      | Electronic<br>Energy | Zero-point<br>correction | Thermal<br>correction<br>to Energy | Thermal<br>correction<br>to<br>Enthalpy | Thermal<br>correction<br>to Gibbs<br>Free<br>Energy | $\Delta(\epsilon_0+ZPE)$ | $\Delta G$ |
|-----------|------|----------------------|--------------------------|------------------------------------|-----------------------------------------|-----------------------------------------------------|--------------------------|------------|
| Molecules |      | [a.u.]               | [a.u.]                   | [a.u.]                             | [a.u.]                                  | [a.u.]                                              | [kJ/mol]                 | [kJ/mol]   |
|           |      | $\epsilon_0$         | ZPE                      | $E_{corr}$                         | $H_{corr}$                              | $G_{corr}$                                          |                          |            |
| Singlet   | S    | -2452.336645         | 0.4223                   | 0.4476                             | 0.4485                                  | 0.3655                                              | 38.5                     | 41.2       |
|           | TSI  | -2452.302722         | 0.4153                   | 0.4399                             | 0.4408                                  | 0.3607                                              | 109.0                    | 117.7      |
|           | PI   | -2452.351274         | 0.4199                   | 0.4455                             | 0.4464                                  | 0.3628                                              | -6.2                     | -4.1       |
|           | TSII | -2452.332251         | 0.4189                   | 0.4438                             | 0.4448                                  | 0.3643                                              | 41.1                     | 49.7       |
|           | PII  | -2452.383649         | 0.4242                   | 0.4488                             | 0.4498                                  | 0.3701                                              | -80.0                    | -70.1      |
| Triplet   | S    | -2452.351325         | 0.4223                   | 0.4476                             | 0.4486                                  | 0.3644                                              | 0.0                      | 0.0        |
|           | TSI  | -2452.325403         | 0.4151                   | 0.4400                             | 0.4409                                  | 0.3582                                              | 49.0                     | 51.7       |
|           | PI   | -2452.356759         | 0.4179                   | 0.4442                             | 0.4452                                  | 0.3580                                              | -26.0                    | -31.3      |
|           | TSII | -2452.344534         | 0.4183                   | 0.4435                             | 0.4445                                  | 0.3617                                              | 7.3                      | 10.8       |
|           | PII  | -2452.402102         | 0.4239                   | 0.4486                             | 0.4496                                  | 0.3681                                              | -129.2                   | -123.7     |
| Quintet   | S    | -2452.344787         | 0.4207                   | 0.4466                             | 0.4476                                  | 0.3615                                              | 13.0                     | 9.4        |
|           | TSI  | -2452.333866         | 0.4157                   | 0.4410                             | 0.4420                                  | 0.3581                                              | 28.4                     | 29.2       |
|           | PI   | -2452.370296         | 0.4166                   | 0.4434                             | 0.4443                                  | 0.3547                                              | -65.0                    | -75.5      |
|           | TSII | -2452.359409         | 0.4172                   | 0.4430                             | 0.4439                                  | 0.3591                                              | -34.7                    | -35.3      |
|           | PII  | -2452.406779         | 0.4219                   | 0.4475                             | 0.4485                                  | 0.3637                                              | -146.8                   | -147.5     |

S – substrates: [(salen)Fe=O])+H-C<sub>6</sub>H<sub>9</sub>,

TSI – [(salen)Fe---O---H-C<sub>6</sub>H<sub>9</sub>],

PI – products1: [(salen)Fe-OH])+C<sub>6</sub>H<sub>9</sub>,

TSII – [(salen)Fe---O(H)---C<sub>6</sub>H<sub>9</sub>],

PII – products2: [(salen)Fe]+C<sub>6</sub>H<sub>9</sub>OH.

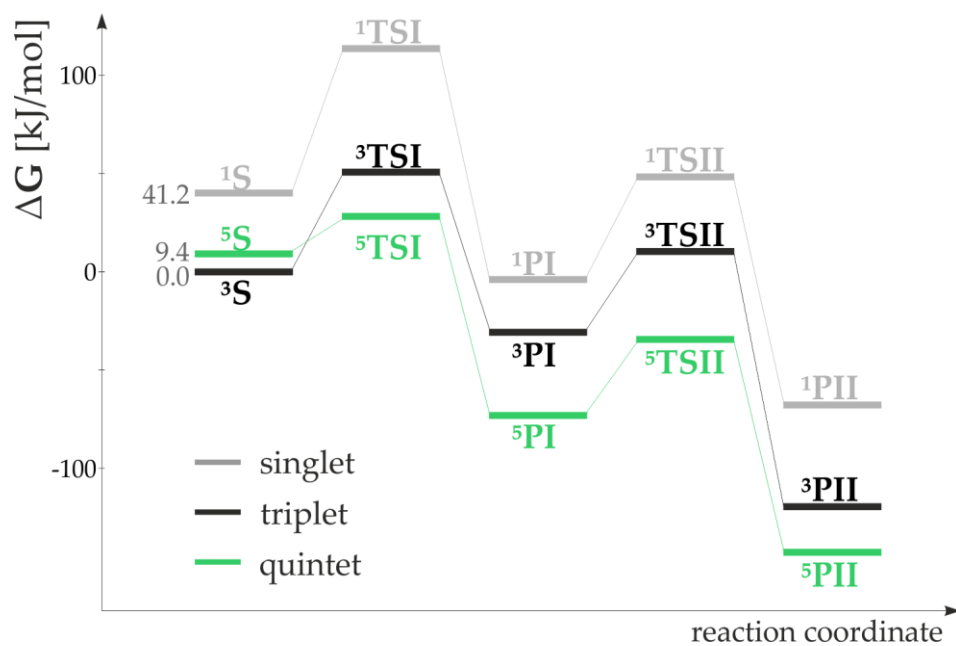

**Figure S9.** Relative Gibbs free enthalpies (Table S5) of the singlet (**1, gray**), triplet (**3, black**), and quintet (**5, green**) for reaction of cyclohexene oxidation catalysed by [(salen)Fe<sup>IV</sup>=O] to alcohol. For the initial complexes S (in three various spin states) the values of starting relative Gibbs free enthalpies are given next to the respective line. The legend of used symbols: S – substrates: [(salen)Fe=O]+H-C<sub>6</sub>H<sub>9</sub>, TSI – [(salen)Fe---O---H-C<sub>6</sub>H<sub>9</sub>], PI – products1: [(salen)Fe-OH]+C<sub>6</sub>H<sub>9</sub>, TSII – [(salen)Fe---O(H)---C<sub>6</sub>H<sub>9</sub>], PII – products2: [(salen)Fe]+C<sub>6</sub>H<sub>9</sub>OH.
